# Supplementary material for: Yeast synaptobrevin, Snc1, engages distinct routes of postendocytic recycling mediated by a sorting nexin, Rcy1-COPI, and retromer
Source: PubMed Central journal article supplement — Mol Biol Cell. 2020 Apr 15;31(9):944–62. doi: 10.1091/mbc.E19-05-0290 (PMC7185969; doi:10.1091/mbc.e19-05-0290), 2020-04-15

# Supplemental Materials

*Molecular Biology of the Cell*

Best et al.

Supplemental Figure 1: The Snx4-Atg20 complex mediates Snc1 recycling

A

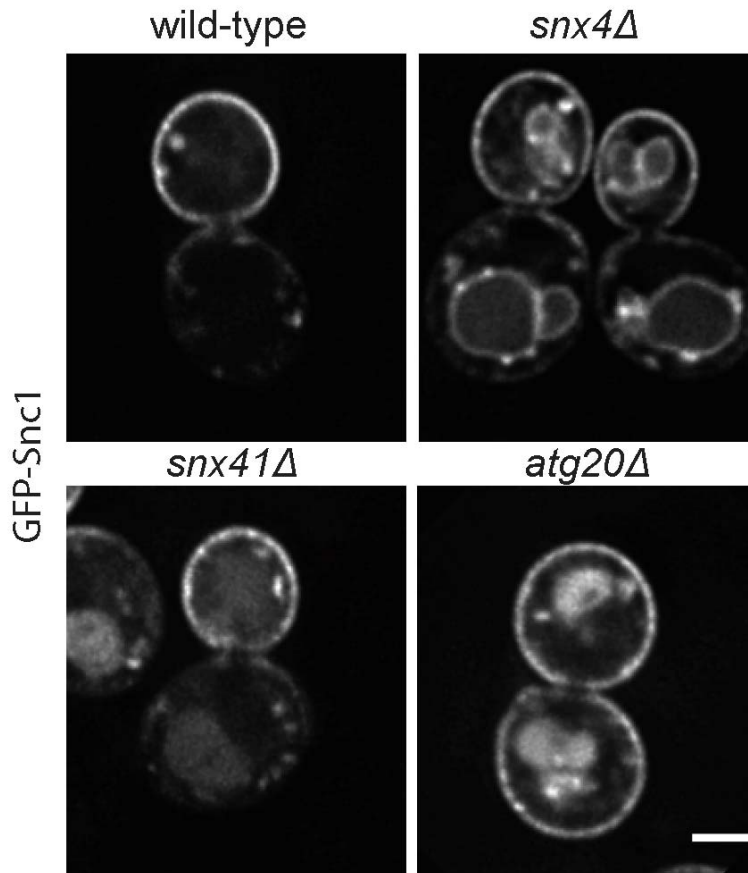

Supplemental Figure 2: Rcy1/Dras2/COPI act within a single pathway of Snc1 retrieval

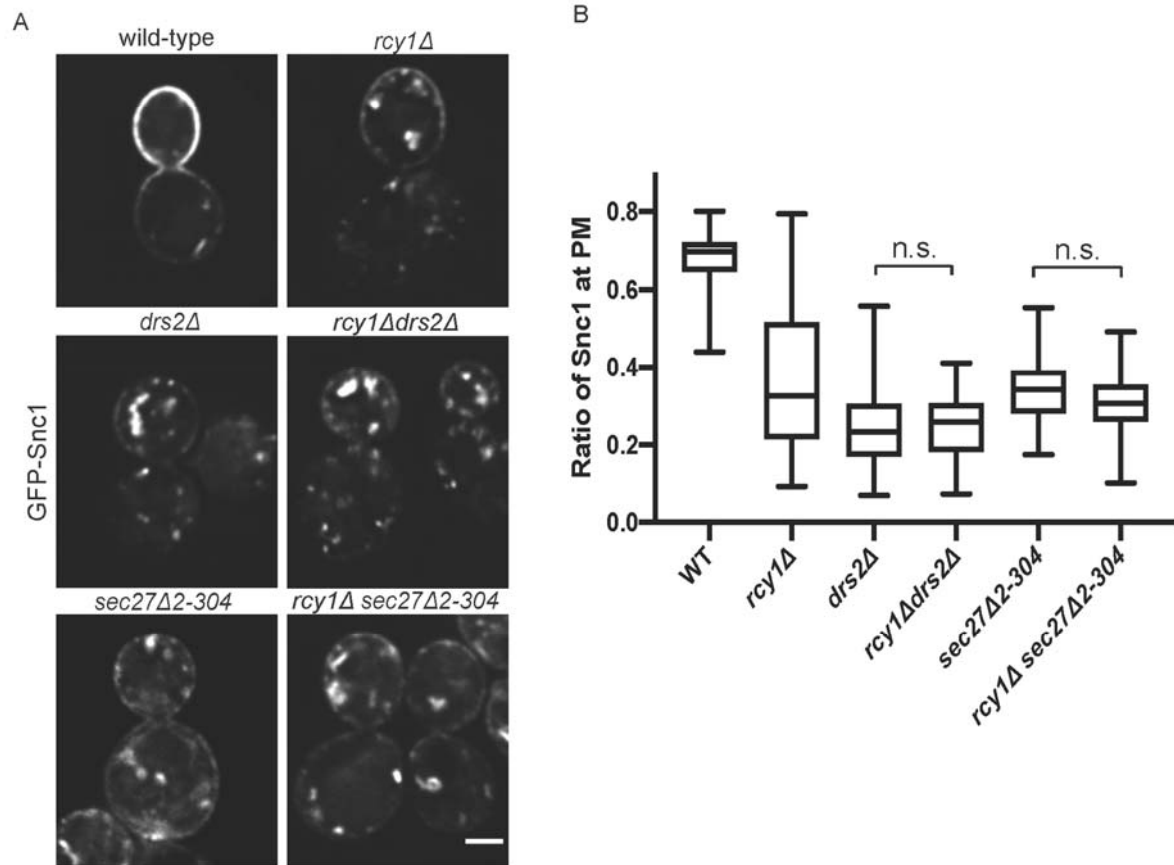

Supplemental Figure 3: Expression of Cu-Inducible mNG-SNAREs

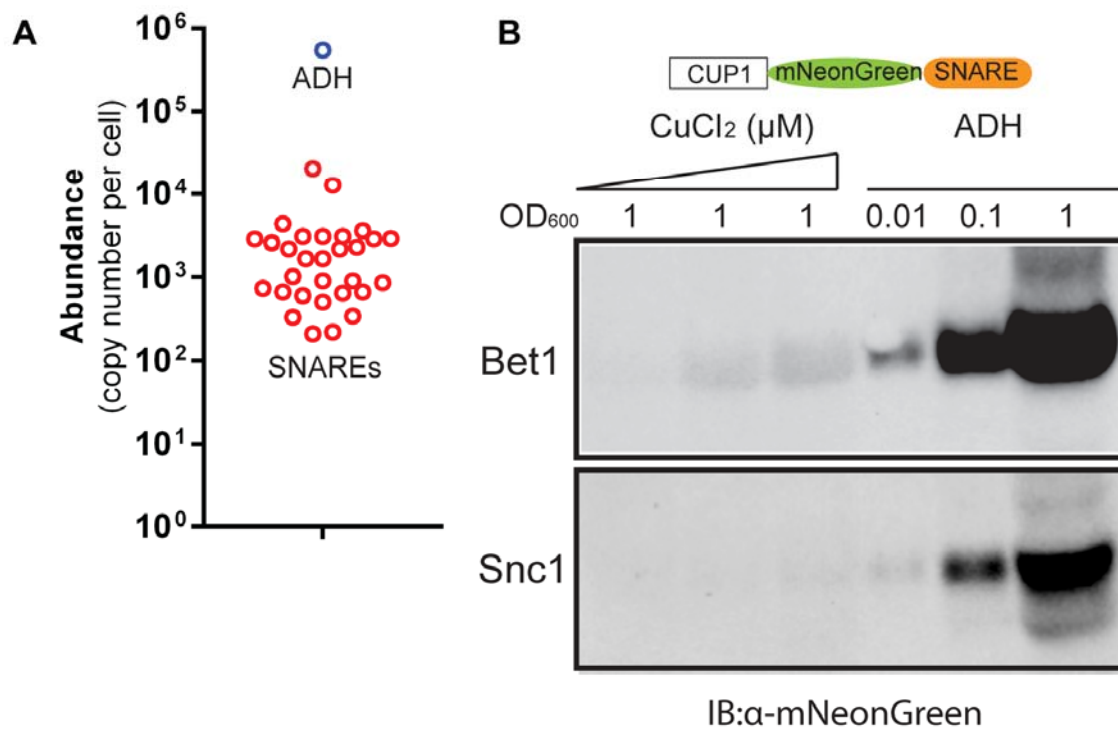

Supplemental Figure 4: Colocalization of Snc1 in *snx4Δ rcy1Δvps35Δ* with endosomal markers

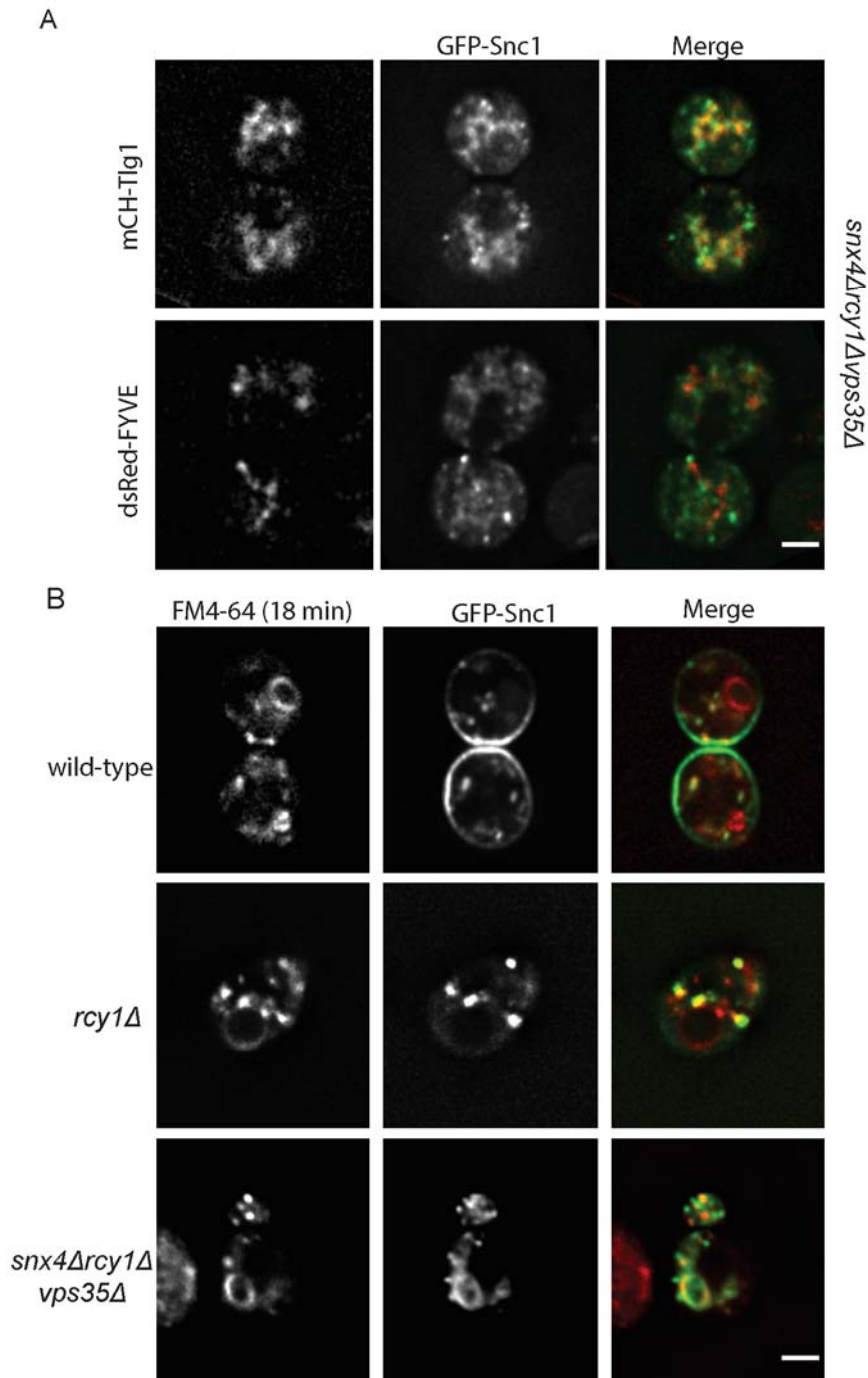

Supplement: mbc-31-944-s001.pdf [file mbc-31-944-s001.pdf]
